# Supplementary material
Source: PubMed Central journal article supplement (PMC6652748)
Supplement: IAI.00044-19-s0001.pdf [file IAI.00044-19-s0001.pdf]

**Table S1. List of strong hits in *Brucella neotomae* high throughput, host cell anti-cytotoxicity screen analyzed in secondary assays.**

| HTS z-score | Compounds                         | Category          | Function                                  | Final Concentration | Secondary Screening z-score | Percent Growth Inhibition |
|-------------|-----------------------------------|-------------------|-------------------------------------------|---------------------|-----------------------------|---------------------------|
| -13.1       | Indirubin-3'-monoxime             | Kinase inhibitor  | CDK/GSK-3 $\beta$ inhibitor               | 10 $\mu$ g/mL       | -10.40                      | 132.2 $\pm$ 4.1           |
| -11.3       | Mitoxantrone 2HCl                 | antimicrobial     | chemotherapeutic                          | 4 $\mu$ g/mL        | -10.40                      | 142.8 $\pm$ 3.0           |
| -7.3        | BX912                             | Kinase Inhibitor  | PDK1 inhibitor                            | 4 $\mu$ M           | -10.34                      | 101.0 $\pm$ 0.2           |
| -10.3       | IKK Inhibitor VII                 | Kinase Inhibitor  | I $\kappa$ B kinase (IKK) inhibitor       | 20 $\mu$ M          | -10.31                      | 116.4 $\pm$ 1.1           |
| -9.3        | DMAB-anabaseine dihydrochloride   | GPCR              | Nicotinic ( $\alpha$ 7) Receptor Agonist  | 20 $\mu$ M          | -10.31                      | 107.0 $\pm$ 8.1           |
| -7.2        | ZM 226600                         | Ion channel modu  | Kir6 (KATP) channel opener                | 20 $\mu$ M          | -10.16                      | 104.6 $\pm$ 10.9          |
| -7.7        | Arcyriaflavin A                   | Kinase Inhibitor  | CDK4/cyclin D1 inhibitor                  | 20 $\mu$ M          | -10.02                      | 95.6 $\pm$ 5.8            |
| -10.9       | CYT387                            | Kinase Inhibitor  | JAK inhibitor                             | 4 $\mu$ M           | -10.00                      | 95.5 $\pm$ 0.1            |
| -7.3        | Rhodblock 6                       | Kinase Inhibitor  | Rho kinase inhibitor                      | 20 $\mu$ M          | -9.99                       | 98.0 $\pm$ 7.8            |
| -7.4        | NS8593 hydrochloride              | Ion channel modu  | KCa2 (SK) channel negative mod            | 20 $\mu$ M          | -9.78                       | 94.9 $\pm$ 9.7            |
| -7.1        | N6-Cyclohexyladenosine            | GPCR              | A1 adenosine receptor agonist             | 20 $\mu$ M          | -9.60                       | 91.2 $\pm$ 2.3            |
| -7.0        | SDZ WAG 994                       | GPCR              | Adenosine A1 receptor agonist             | 20 $\mu$ M          | -9.57                       | 91.1 $\pm$ 7.2            |
| -7.1        | MDL 73005EF hydrochloride         | GPCR              | SR-1A partial agonist                     | 20 $\mu$ M          | -9.49                       | 90.1 $\pm$ 11.2           |
| -7.2        | ( $\pm$ )-5'-Chloro-5'-deoxy-ENBA | GPCR              | Adenosine A1 receptor agonist             | 20 $\mu$ M          | -9.34                       | 88.6 $\pm$ 3.7            |
| -7.5        | Esomeprazole magnesium dihydr     | proton pump inhib | proton pump inhibitor                     | 20 $\mu$ M          | -9.19                       | 86.9 $\pm$ 2.1            |
| -7.3        | ABT 724 trihydrochloride          | GPCR              | D4DR (dopamine D4 receptor)               | 20 $\mu$ M          | -8.73                       | 82.1 $\pm$ 7.9            |
| -7.4        | Flutamide                         | GPCR              | Androgen Receptor Inhibitor               | 20 $\mu$ M          | -8.29                       | 77.4 $\pm$ 4.3            |
| -8.5        | Pinacidil                         | Ion channel modu  | ATP-sensitive potassium channe            | 20 $\mu$ M          | -7.97                       | 74.0 $\pm$ 12.5           |
| -7.5        | SP-600125                         | Kinase Inhibitor  | JNK Inhibitor                             | 10 $\mu$ g/mL       | -7.94                       | 73.8 $\pm$ 4.5            |
| -8.5        | Buspirone hydrochloride           | GPCR              | 5-HT1A partial agonist                    | 4 $\mu$ g/mL        | -7.76                       | 71.9 $\pm$ 6.5            |
| -7.5        | 8-Cyclopentyl-1,3-dimethylxanth   | GPCR              | A1 adenosine receptor antagonist          | 20 $\mu$ M          | -7.65                       | 70.7 $\pm$ 12.3           |
| -11.1       | LY-83583                          | other             | soluble guanylate cyclase inhibi          | 10 $\mu$ g/mL       | -7.64                       | 70.6 $\pm$ 14.3           |
| -8.1        | Doxazosin mesylate                | GPCR              | $\alpha$ 1 antagonist                     | 4 $\mu$ g/mL        | -7.52                       | 69.4 $\pm$ 7.6            |
| -9.1        | KI20227                           | Kinase Inhibitor  | CSF1R inhibitor                           | 4 $\mu$ M           | -7.33                       | 67.3 $\pm$ 1.9            |
| -7.2        | Crinamine                         | other             | HIF1a inhibitor                           | 20 $\mu$ M          | -5.95                       | 52.8 $\pm$ 16.6           |
| -7.8        | AG 555                            | Kinase Inhibitor  | EGFR inhibitor                            | 20 $\mu$ M          | -4.75                       | 40.1 $\pm$ 7.5            |
| -8.0        | RN 1747                           | Ion channel modu  | TRPV4 agonist                             | 20 $\mu$ M          | -4.46                       | 37.1 $\pm$ 10.4           |
| -7.0        | Dantrolene                        | Ion channel modu  | Ca2+ ions inhibitor                       | 10 $\mu$ g/mL       | -4.08                       | 33.1 $\pm$ 2.2            |
| -7.1        | GW 441756                         | Kinase Inhibitor  | TrkA inhibitor                            | 20 $\mu$ M          | -3.87                       | 30.8 $\pm$ 0.8            |
| -8.0        | SU-4312                           | Kinase Inhibitor  | EGFR and c-Src tyrosine kinase            | 10 $\mu$ g/mL       | -3.86                       | 31.1 $\pm$ 6.1            |
| -7.0        | Ro 90-7501                        | other             | inhibitor of A $\beta$ 42 fibril formatio | 20 $\mu$ M          | -3.74                       | 29.6 $\pm$ 6.0            |
| -7.2        | Tyrphostin AG 835                 | Kinase Inhibitor  | Casein kinase II inhibitor                | 20 $\mu$ M          | -3.64                       | 28.4 $\pm$ 12.3           |
| -8.7        | Rabeprazole sodium                | proton pump inhib | proton pump inhibitor                     | 4 $\mu$ g/mL        | -3.63                       | 28.3 $\pm$ 10.5           |
| -7.6        | Pantoprazole                      | proton pump inhib | proton pump inhibitor                     | 4 $\mu$ g/mL        | -3.59                       | 28.0 $\pm$ 2.5            |
| -9.1        | Alfluzosin                        | GPCR              | $\alpha$ 1 adrenoceptor antagonist        | 4 $\mu$ g/mL        | -3.59                       | 27.9 $\pm$ 2.1            |
| -8.6        | Cilostazol                        | other             | PDE3 inhibitor                            | 4 $\mu$ g/mL        | -3.42                       | 26.2 $\pm$ 1.2            |
| -8.5        | Tanshinone IIA                    | other             |                                           | 10 $\mu$ g/mL       | -3.38                       | 25.7 $\pm$ 16.6           |
| -7.1        | GW-5074                           | Kinase Inhibitor  | Raf Inhibitor                             | 10 $\mu$ g/mL       | -3.28                       | 24.7 $\pm$ 23.5           |
| -7.7        | AG 490                            | Kinase Inhibitor  | EGFR inhibitor                            | 20 $\mu$ M          | -3.14                       | 23.2 $\pm$ 1.6            |
| -7.1        | R(-)-2,10,11-Trihydroxyaporphin   | GPCR              | D2 dopamine receptor agonist              | 20 $\mu$ M          | -2.46                       | 16.0 $\pm$ 2.6            |
| -11.6       | Epigallocatechin gallate          | other             |                                           | 20 $\mu$ M          | -2.29                       | 14.3 $\pm$ 9.5            |
| -7.5        | Tyrphostin B44, (+) enantiomer    | Kinase Inhibitor  | EGFR kinase inhibitor                     | 20 $\mu$ M          | -2.25                       | 13.8 $\pm$ 3.4            |
| -7.1        | Phenserine                        | other             | AChE inhibitor                            | 20 $\mu$ M          | -2.15                       | 12.8 $\pm$ 12.5           |
| -7.3        | GF 109203X                        | Kinase Inhibitor  | PKC inhibitor                             | 20 $\mu$ M          | -2.08                       | 12.0 $\pm$ 19.5           |
| -7.1        | Nafamostat mesylate               | other             | serine protease inhibitor, anticoa        | 10 $\mu$ g/mL       | -1.81                       | 9.2 $\pm$ 8.6             |
| -7.2        | SR 11302                          | other             | AP-1 inhibition-specific retinoid         | 20 $\mu$ M          | -1.21                       | 2.8 $\pm$ 11.7            |
| -7.4        | Cortisone                         | steroid           | steroid                                   | 20 $\mu$ M          | -0.55                       | -4.2 $\pm$ 13.3           |
| -7.0        | NU6027                            | Kinase Inhibitor  | ATR/CDK Inhibitor                         | 20 $\mu$ M          | -0.17                       | -8.1 $\pm$ 4.2            |
| -7.1        | Nifedipine                        | Ion channel modu  | Ca2+ ions inhibitor                       | 4 $\mu$ g/mL        | 3.52                        | -47.0 $\pm$ 8.6           |

\*shading indicates compounds that were further studied in this manuscript

**Table S2. List of siRNA nucleotides used in hit target and autophagy protein knockdown experiments.**

| siRNA                          | Sequences (5'-3') Sense                                       | Reference    | Identifier   |
|--------------------------------|---------------------------------------------------------------|--------------|--------------|
| ATG5si                         | 1. CUCUCUAUCAGGAUGAGAUAAACUGA<br>2. CUUGGAACAUCACAGUACAUUUCAA | This paper   | N/A          |
| ATG12si                        | 1. ACCAAGAAGUUGGAACUCUAUAUGA<br>2. GUUGUUUAUUUAUGUGAAUCAGUCC  | This paper   | N/A          |
| LC3si                          | 1. AGCGAGCUCAUCAAGAUAAUCAGAC<br>2. AUGAGCGAGCUCUCAAGAUAAUCA   | This paper   | N/A          |
| p62si                          | 1. AGGUUGACAUUGAUGUGGAACAUGG<br>2. CUGACAGAGCAAAUGAAAAAGAUAG  | This paper   | N/A          |
| CDK1si                         | 1. AGAAAAUUGGAGAAGGUACUUACGG<br>2. GACUUGGACAAUCAGAUUAAGAAGA  | This paper   | N/A          |
| CDK4si                         | 1. CAGAGAACAUCUAGUGACAAGUAA<br>2. CUGAAGCCAGAGAACAUCUAGUGA    | This paper   | N/A          |
| CSF1Rsi                        | 1. GGCAUCUGGCUUAAGGUGAAUCGAG<br>2. GGAAUAAUCUGACCUUUGAGCUCAC  | This paper   | N/A          |
| JAK1si                         | 1. GAGGUGACUUUCUAUCUGUUGGACA<br>2. AAACAUUGAAUAAAUCCAUCAGACA  | This paper   | N/A          |
| Rab7si                         | GCCUCCGCAGAAAGCUGCAGUUGUU                                     | ThermoFisher | MSS276705    |
| Negative control DsiRNA (NTsi) | CGUUAUUCGCGUAUAAUACGCGUAT                                     | IDT          | #51-01-14-03 |

**Table S3. List of oligonucleotide primer sequences used for analysis of qPCR-based mRNA expression analysis in siRNA-knockdown experiments.**

| Target genes   | Primer Sequences (5'-3')                          | Reference           | Genbank accession for gene target |
|----------------|---------------------------------------------------|---------------------|-----------------------------------|
| CDK1           | CCGGTTGACATCTGGAGTATAG/<br>ATCCTGAAGAGCTGGTCAATC  | This paper          | NM_007659                         |
| CDK4           | TTTCTAAGCGCCTGGATTT/<br>GCTTGACGGTCCCATTACTT      | This paper          | NM_009870                         |
| CSF1R          | CTGGGACAGCACGAGAATATAG/<br>TCCTTCGGAGAAAGTTGAGATG | This paper          | NM_001037859                      |
| JAK1           | CCTCATGAACCACCTCAAGAA/<br>GCTACGAGCAGATTGGAGATT   | This paper          | NM_146145                         |
| $\beta$ -actin | GTGGGAATGGGTCAGAAGG/<br>GCTCATTGTAGAAGGTGTGG      | Kang & Kirby (2019) | NM_007393.5                       |

Kang YS, Brown DA, Kirby JE. 2019. *Brucella neotomae* recapitulates attributes of zoonotic human disease in a murine infection model. Infect Immun. 87: pii: e00255-18.

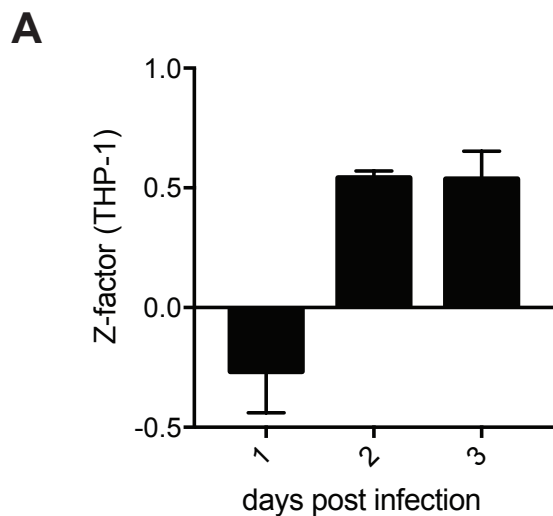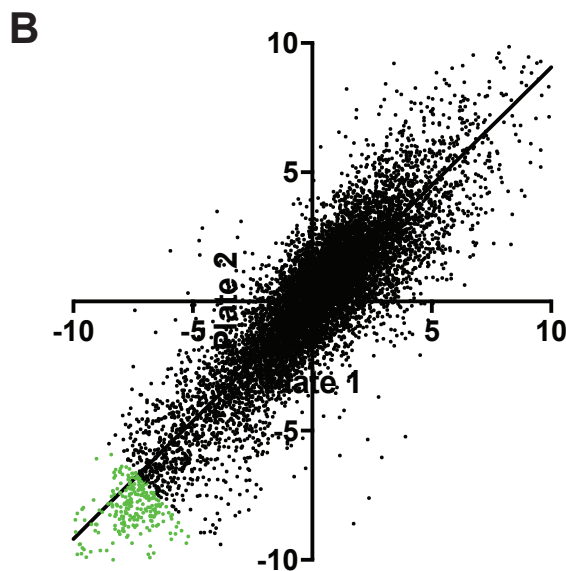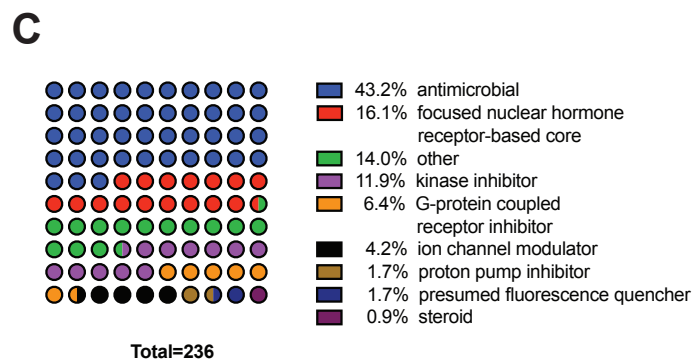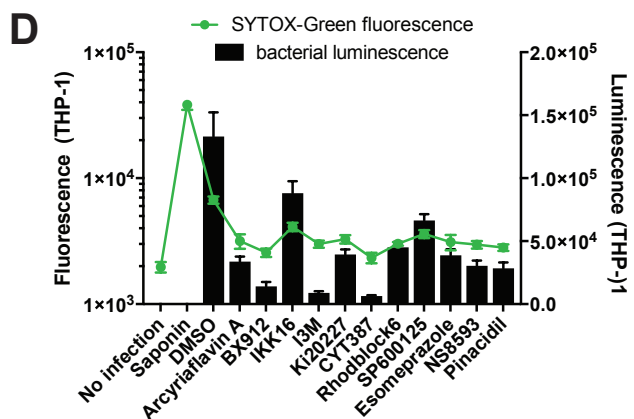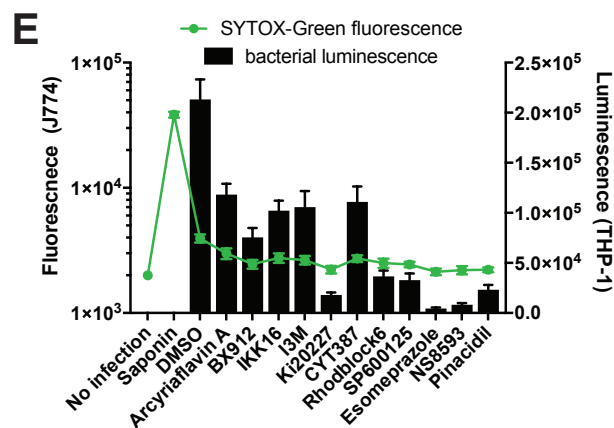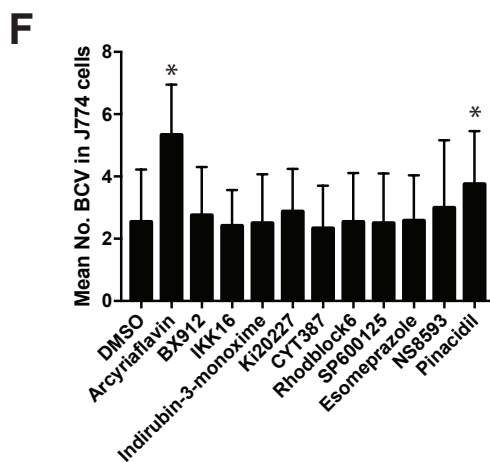

**Figure S1. High throughput screening assay characteristics.** (A) Bn infection of THP-1 cells were allowed to proceed for indicated time points in the presence of SYTOX Green to provide a real-time indicator of eukaryotic cell toxicity. Positive control wells contained antibiotic to inhibit intracellular bacterial growth. Negative controls wells contained corresponding amount of DMSO. Z-factor was maximal two days post infection. Bar height and error bars reflect the mean and S.D. for Z-factor determinations from three separate experiments, 20 replicate test wells per condition per experiment. (B) XY-scatter plot of z-score replicates for each tested compound, the z-score for the first replicate indicated by X-axis coordinate and the second replicate by the Y-axis coordinate for each data point.  $R^2 = 0.83$ . Zero values reflect control levels of cytotoxicity induced by intracellular growth 48 hours post infection. Negative z-scores reflect inhibition of eukaryotic cell toxicity reflected in negative fluorescence compared with untreated control wells. Green colored data represent strong hits, which were considered for further analysis. (C) General categorization of screening hits from known bioactive libraries. Tally was performed after removing compounds that were duplicated in the multiple known bioactive libraries tested. (D) Bacterial luminescence and THP-1 host cell cytotoxicity. Bacterial luminescence as a measure of intracellular replication and SYTOX Green fluorescence as a measure of host cell cytotoxicity were measured contemporaneously 48 h post infection in the same assays wells in the presence of absence of compounds at same concentrations used in Fig. 1A. 0.1% saponin, a detergent, was used a positive control for host cell cytotoxicity that lyses host cells and prevents bacterial growth. Inhibitors decreased both intracellular growth and host cell cytotoxicity. Data are the mean and standard deviation for sextuplicate test wells. Inhibitors significantly decreased ( $P < 0.0001$ , post hoc Dunnett's multiple comparison tests) both intracellular growth and host cell cytotoxicity for all conditions compared with DMSO infected control (except for saponin lysis which caused significantly greater fluorescence). (E) Bacterial luminescence and J774A.1 host cell cytotoxicity. Bacterial luminescence as a measure of intracellular replication and SYTOX-Green fluorescence as a measure of host cell cytotoxicity were measured contemporaneously 48 h post infection in the same assays wells in the presence of absence of compounds at same concentrations used in Fig. 1A. Data are the mean and standard deviation for sextuplicate test wells. 0.1% saponin was used a positive control for host cell cytotoxicity. Inhibitors significantly decreased ( $P < 0.05$ , post hoc Dunnett's multiple comparison tests) both intracellular growth and host cell cytotoxicity for all conditions compared with DMSO infected control (except for saponin lysis which caused significantly greater fluorescence). The magnitude of host cell cytotoxicity resulting from intracellular infection of J774A.1 cells was lower than for THP-1 cells. Correspondingly, the magnitude of cytotoxicity suppression by inhibitors was also lower for J774A.1 cells. (F) At 4 h post infection, the mean number and S.D. of intracellular Bn in infected J774A.1 cells was determined by confocal microscopy; 50 host cells were scored per condition. There were no significant difference between uptake in inhibitor treated host cells, with the exception of a significant increase (\*) in uptake during treatment with arcyriaflavin A and pinacidil in post hoc comparisons with DMSO control.

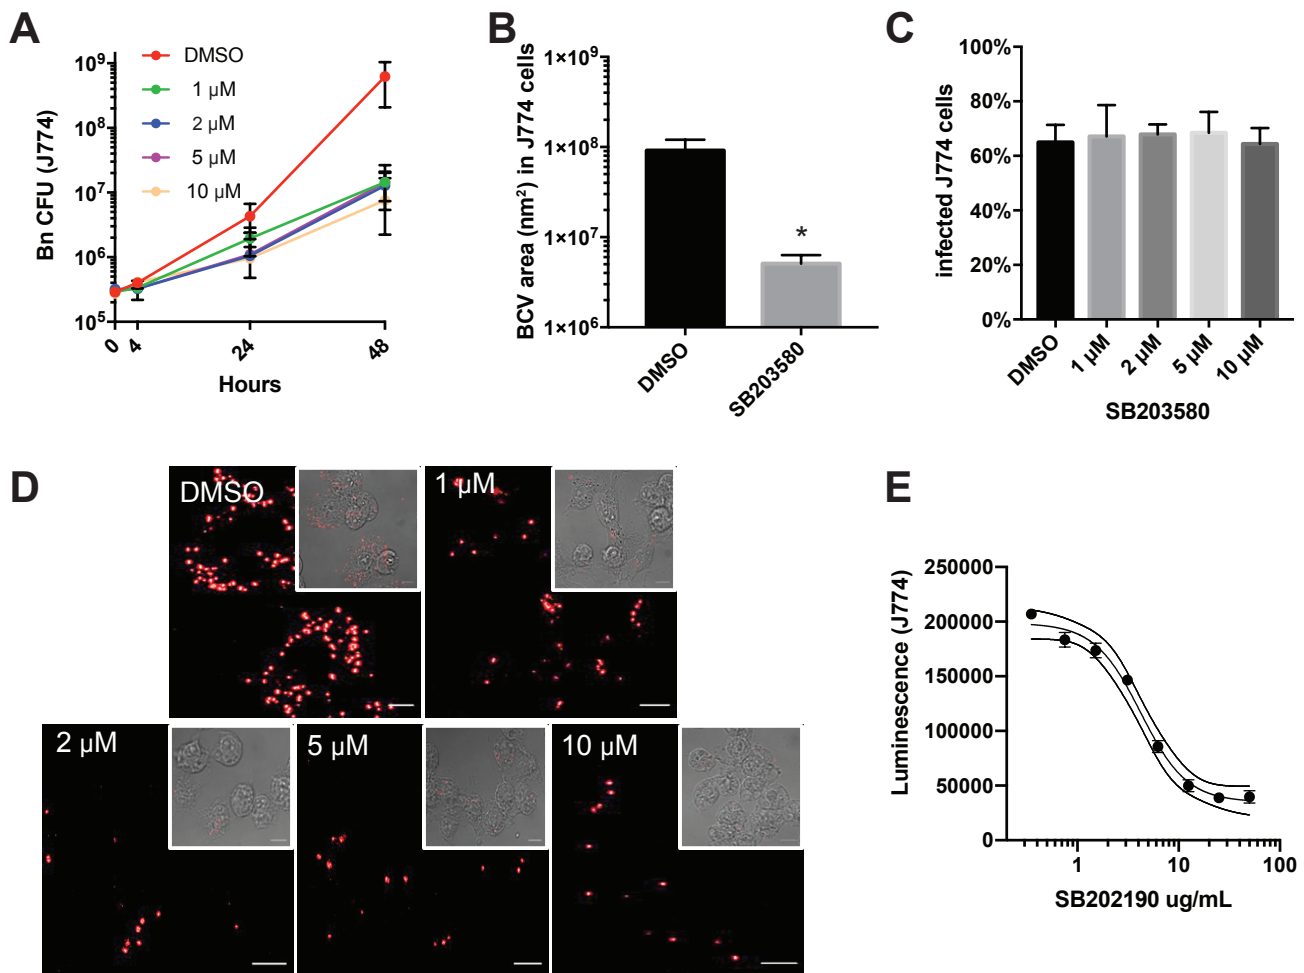

**Figure S2. MAPK p38 is induced by and modulates intracellular infection.** (A) Effect of p38 MAPK inhibition by SB203580 on intracellular growth of *B. neotomae*. J774A.1 cells were treated with SB203580 at indicated concentrations and infected with *B. neotomae* (Bn). Intracellular CFUs were determined at 0, 4, 24, and 48 h post infection. Data presented are the mean  $\pm$  SD from two independent experiments. (B) Mean  $\pm$  S.D. of the area occupied by BCV 48 h post infection in ten infected J774A.1 host cells scored per condition from confocal microscopy images.  $P = 0.001$  for comparison with DMSO control. (C) At 24 h post infection, the mean percentage  $\pm$  S.D. of J774A.1 cells infected with any *B. neotomae* in the presence of indicated concentration of SB203580 or DMSO control was determined by confocal microscopy;  $>100$  host cells were scored per condition over 3 independent experiments. There were no significant differences in uptake between conditions ( $P = 0.9$ ). (D) J774A.1 cells were similarly treated and infected with *B. neotomae* expressing tdTomato at an MOI of 1. Representative confocal micrographs 24 h post infection are shown. (E) Effect of SB202190, an alternative p38 MAPK inhibitor on intracellular growth (luminescence) in J774A.1 host cells. Dose-response analysis (solid line) indicates  $IC_{50}$  of  $\sim 4 \mu\text{g/mL}$  determined from a non-linear four parameter regression with 95% confidence interval shown as dotted lines.

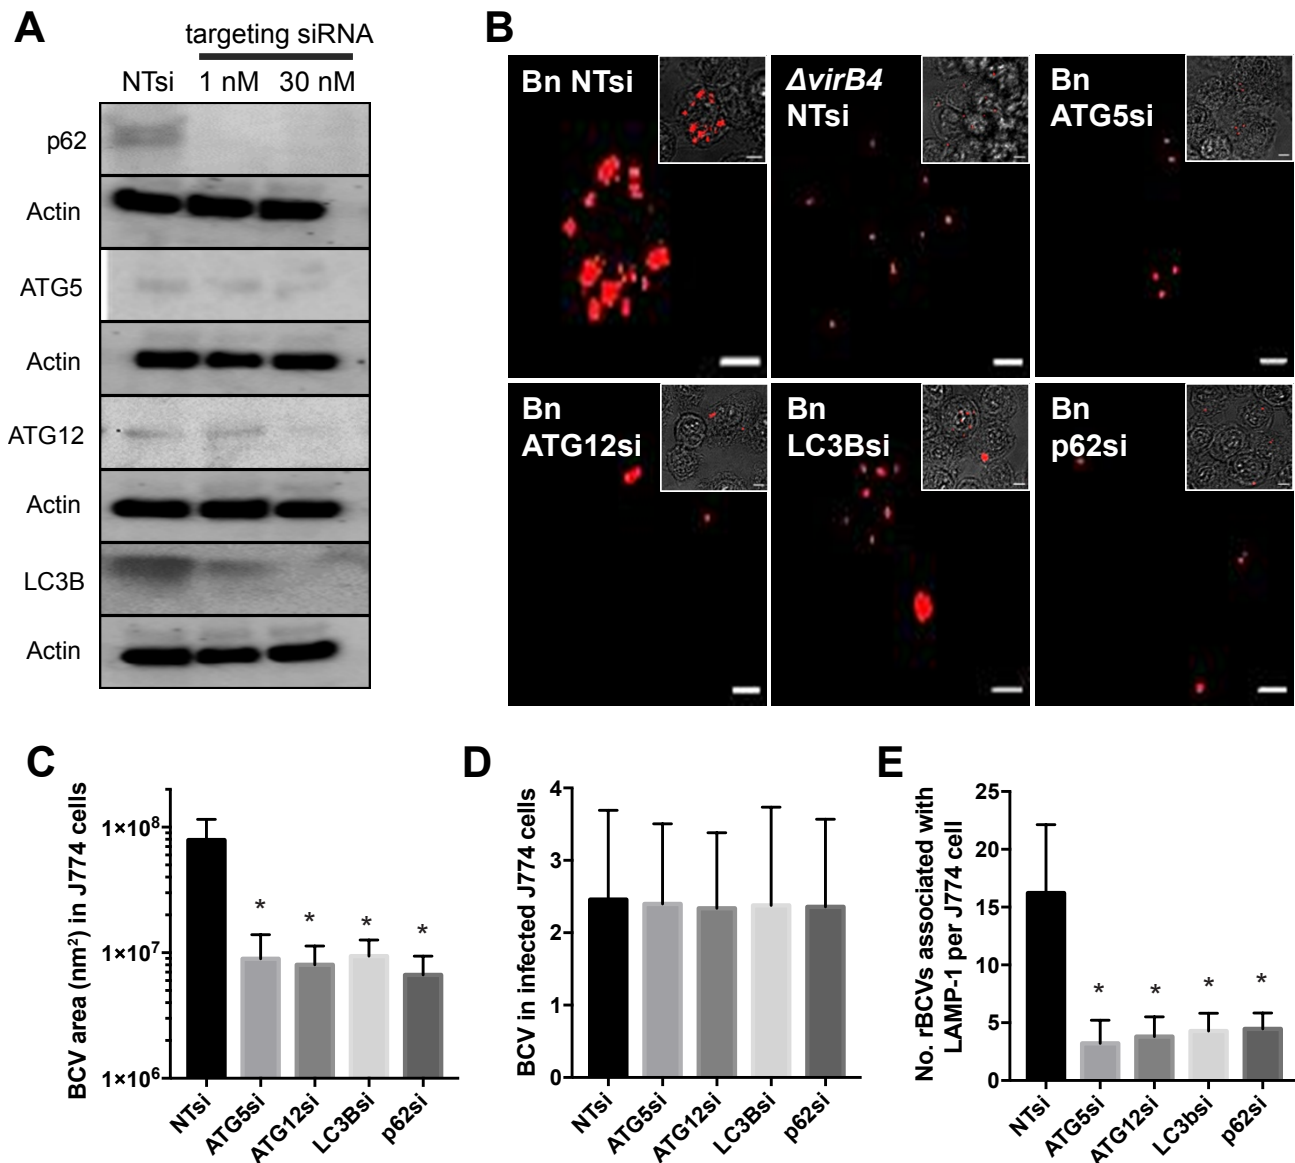

**Figure S3. Autophagy-related proteins are required for the intracellular growth of Bn in J774A.1 macrophages.** (A) Western blot analysis of the expression of autophagy-related protein and  $\beta$ -actin loading control in J774A.1 cells transfected with corresponding targeting or non-targeting siRNA and detection with cognate antibodies. ATG5 and ATG12 antibodies, respectively, detect the conjugated form of ATG5-ATG12, which runs at  $\sim 56$  kDa. NTsi was transfected at 50 nM. (B) The intracellular replication of tdTomato reporter-labeled Bn WT or  $\Delta virB4$  strain in J774A host cells transfected with indicated siRNA. Infections were at an MOI 1, and images were acquired 24 h post infection. Size bars: 5  $\mu$ m. (C) Mean  $\pm$  S.D. of the area occupied by BCV in confocal images of 10 infected host cells scored per condition 48 h post infection.  $P = 0.001$  for each pairwise post hoc comparison with NTsi control. (D) At 4 hours post infection, the mean number  $\pm$  S.D. of intracellular Bn in infected J774A.1 cells was determined by confocal microscopy; 50 host cells were scored per condition. There were no significant differences in uptake between siRNA-treated host cells compared to NTsi control ( $P > 0.9$  for all pairwise post hoc comparisons). (E) Quantification of the mean number  $\pm$  S.D. of rBCV associated with LAMP-1 in infected J774A.1 cells 48 h post infection. rBCV are defined by BCV  $> 2 \mu$ m. 50 infected host cells scored per condition.  $P \leq 0.001$  for each pairwise post hoc comparison with NTsi control. In figure panels, \* designates significant difference in post hoc comparisons with NTsi control.

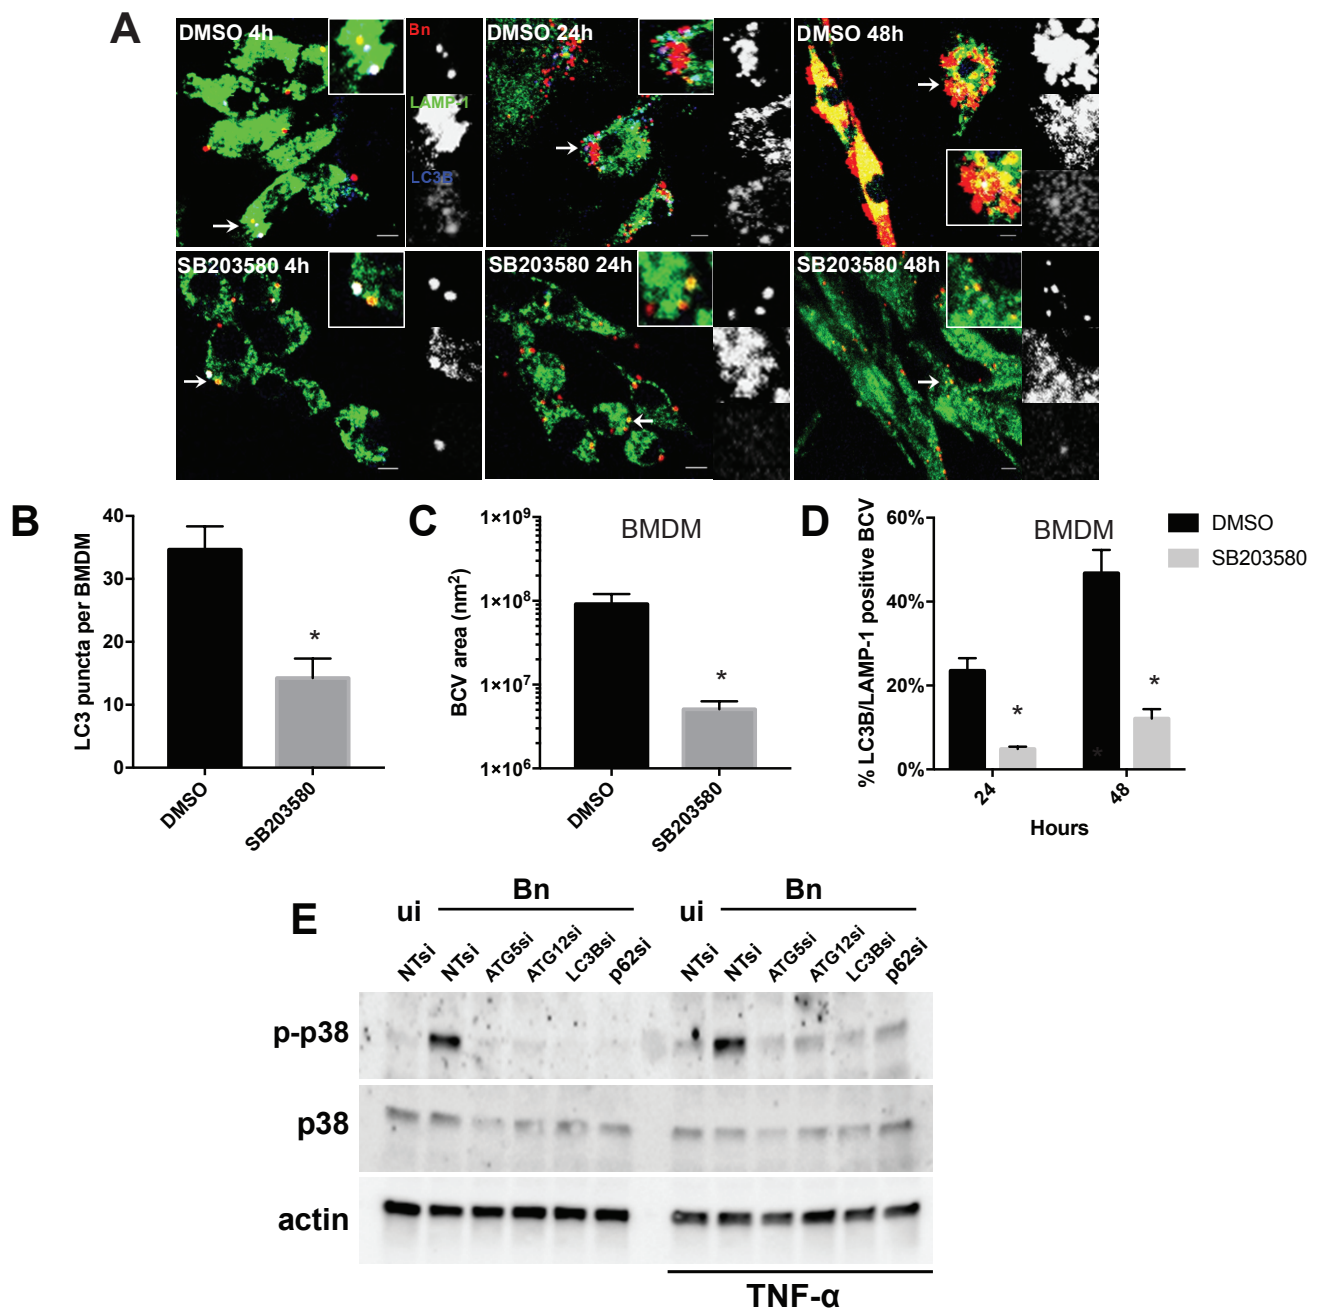

**Figure S4. Linkage between p38 and autophagy pathways.** (A) Colocalization of LC3B (blue), LAMP-1 (green), and Bn (red) in bone marrow-derived macrophages (BMDM) isolated from BALB/c mice) treated with DMSO or 10  $\mu$ M of SB203580. Arrows highlight colocalization of BCV with LC3B and LAMP-1 highlighted in insets. Scale bar: 5  $\mu$ m. (B) The mean number  $\pm$  SD of LC3 puncta from fifty infected BMDM per condition four hours post infection. (C) The mean  $\pm$  S.D. of the area occupied by BCV 48 h post infection in ten infected BMDM scored per condition from confocal microscopy images.  $P < 0.0001$  for comparison with DMSO control. (D) Percent colocalization of BCV with both LC3B and LAMP-1 in BMDM 24 and 48 h post-infection. Data shown are the mean  $\pm$  SD from three independent experiments with  $> 75$  BCV scored per condition per experiment. In figure panels, \* designates significant difference in comparisons with DMSO control (Student's t-test,  $P < 0.05$ ). (E) Autophagy pathway siRNA knockdowns selectively inhibit p38 phosphorylation induced by Bn but not by TNF- $\alpha$  in J774A.1 host cells. Western blots performed on lysates of either infected (Bn) or uninfected (ui) J774A.1 cells transfected with indicated siRNA and/or treated with 100 ng/mL TNF- $\alpha$ . Infections were for 48 h. TNF- $\alpha$  induced a modest increase in p38 phosphorylation in uninfected host cells and in siRNA treated host cells infected with Bn.

**A**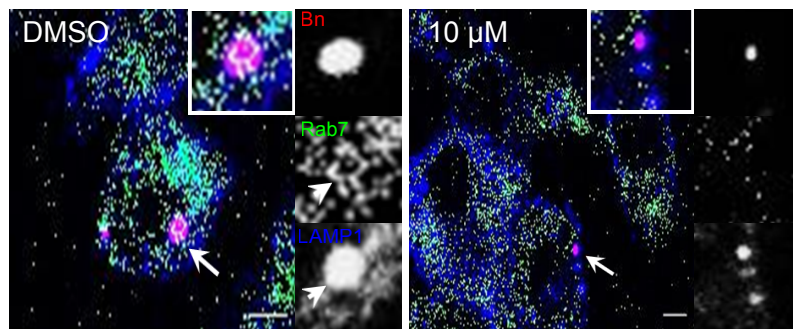**B**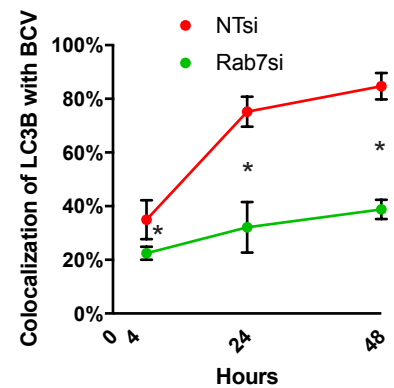

**Figure S5. Rab7 and p38 are required for BCV maturation in J774A.1 host cells.** (A) SB203580 treatment inhibited colocalization of Rab7 (green) with BCV (red). Shown are representative confocal micrographs of J774A.1 cells 6 h post infection. Arrows point respectively under control conditions to an example of a LAMP-1::mTurquoise2-positive BCV to which there is significant Rab7 recruitment, and with 10  $\mu$ M SB203580 treatment to a BCV that is LAMP-1::mTurquoise2 positive and Rab7 negative. Size bar: 5  $\mu$ m. (B) Effect of 50 nM Rab7si transfection on LC3B colocalization with BCV in J774A.1 host cells enumerated from confocal images. Each data point represents mean percent colocalization  $\pm$  SD from four independent experiments scoring at least 50 representative BCV per condition per experiment. In figure panels, \* designates significant difference in comparisons with NTsi control.
